# Supplementary material for: Introns mediate post-transcriptional enhancement of nuclear gene expression in the green microalga Chlamydomonas reinhardtii
Source: PubMed Central journal article supplement (PMC7419008; doi:10.1371/journal.pgen.1008944), 2020-07-30
Supplement: pgen.1008944.s002.pdf [file pgen.1008944.s002.pdf]

S2 Fig: Relative transformation efficiency of four selected introns (RBCS2i1 RBCS2i2, LHCBM1i2 and  $\beta$ TUB2i3) with different IME capacities. Selection after transformation was performed at different light intensities (150, 350 and 700  $\mu\text{mol photons m}^{-2} \text{s}^{-1}$ ). Data represents the mean of biological triplicates.

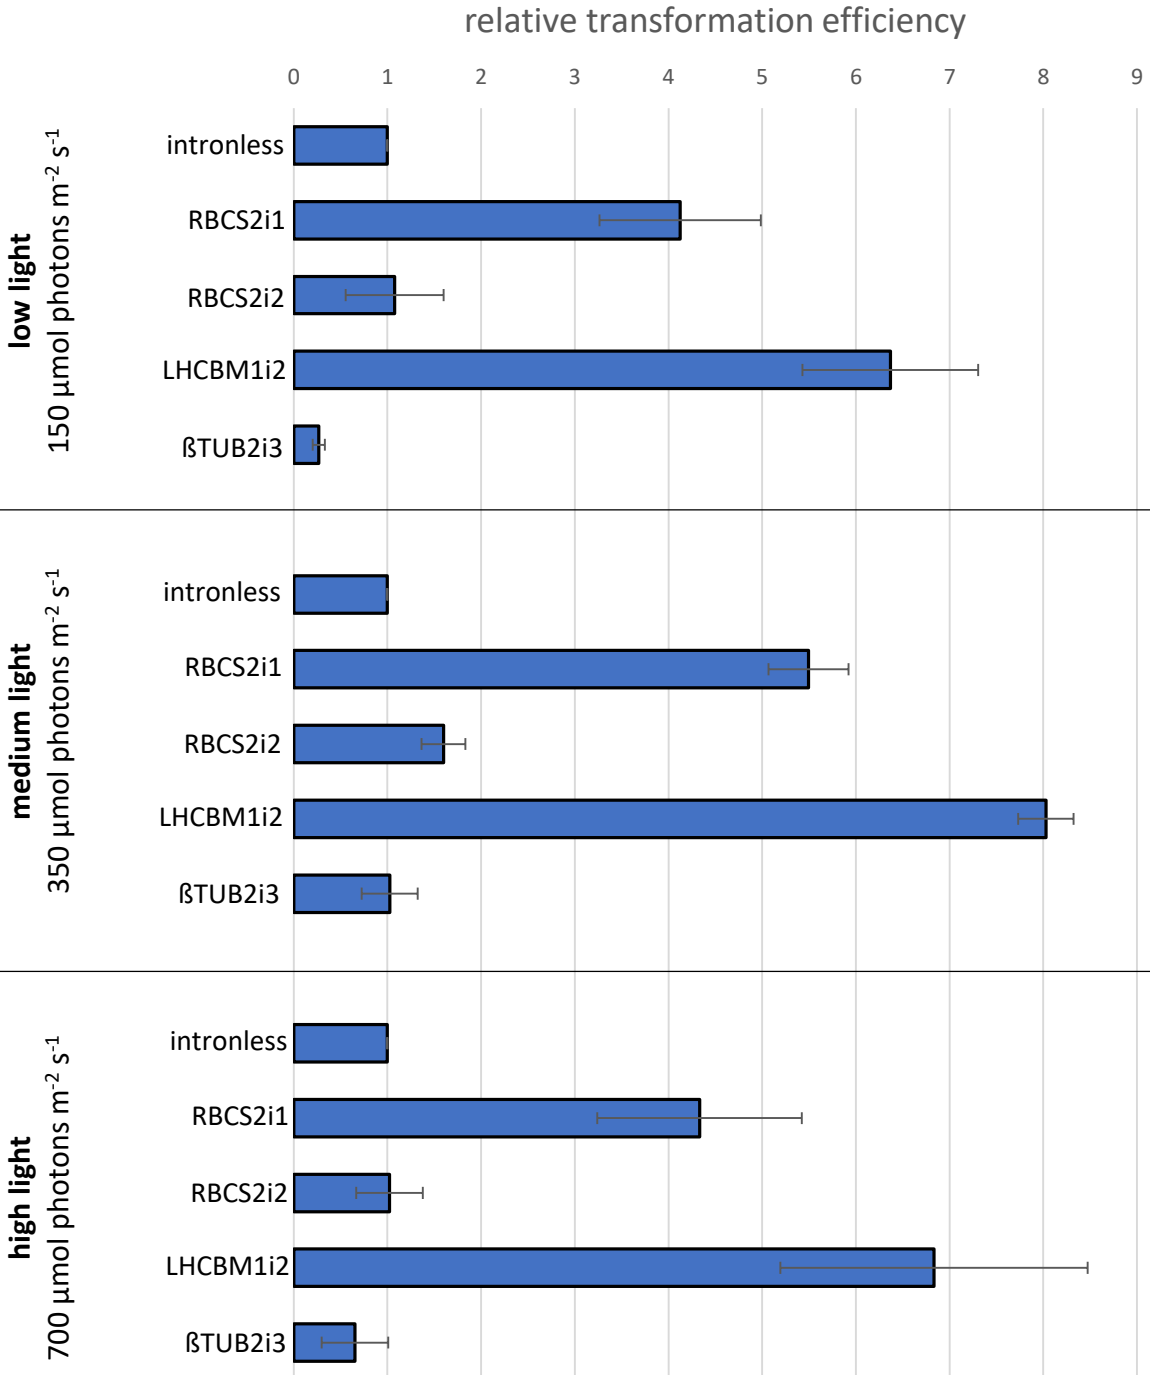

n = 3
