# Supplementary material for: Introns mediate post-transcriptional enhancement of nuclear gene expression in the green microalga Chlamydomonas reinhardtii
Source: PubMed Central journal article supplement (PMC7419008; doi:10.1371/journal.pgen.1008944), 2020-07-30

S3 Fig: Relative transformation efficiency after addition of RBCS2i1\_E2. (A) Relative transformation efficiency of RBCS2i1 after deletion of the E2 sequence element (RBCS2i1ΔE2) and after addition of one or two copies of the E2 (RBCS2i1, RBCS2i1\_2xE2, RBCS2i1\_3xE2) compared to the unchanged RBCS2i1 and the intronless control. (B) Relative transformation efficiency of the exogenous intron 12 (synthetic murine intron) and after addition of RBCS2i1E2.

A

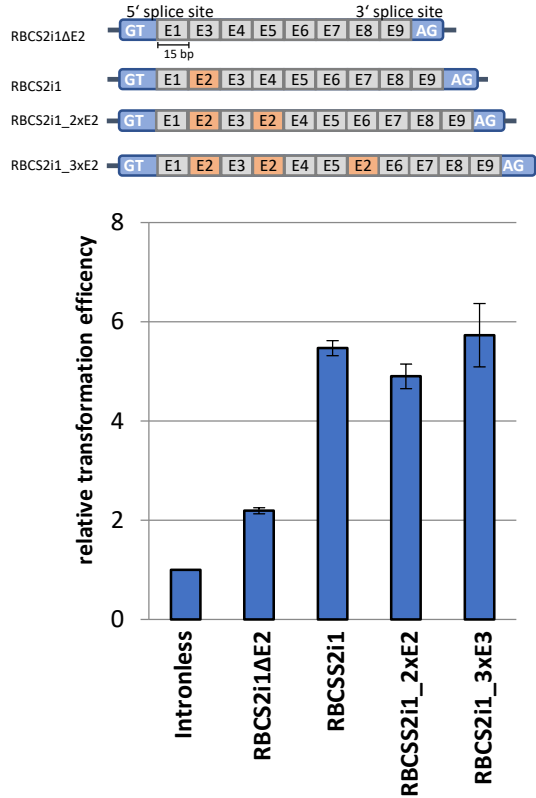

B

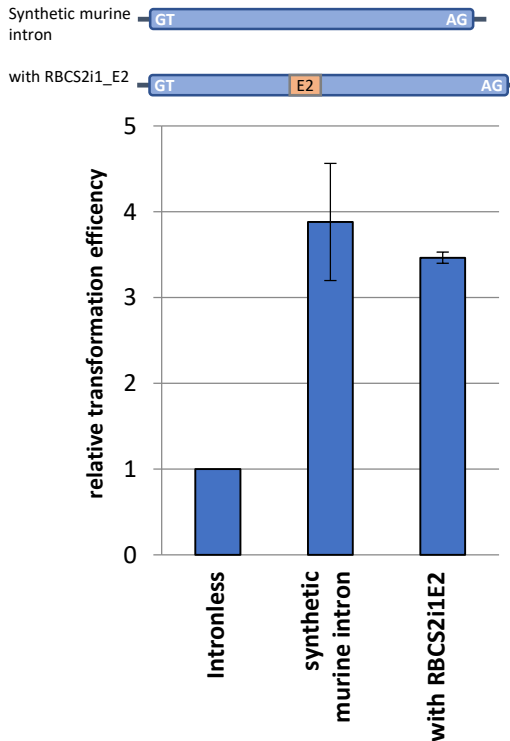

Supplement: pgen.1008944.s003.pdf [file pgen.1008944.s003.pdf]
