# Supplementary material for: Introns mediate post-transcriptional enhancement of nuclear gene expression in the green microalga Chlamydomonas reinhardtii
Source: PubMed Central journal article supplement (PMC7419008; doi:10.1371/journal.pgen.1008944), 2020-07-30
Supplement: pgen.1008944.s005.pdf [file pgen.1008944.s005.pdf]

S5 Fig: Motif based sequence analysis via Multiple Em for Motif Elicitation tool (MEME, version 5.1.1) performed with six endogenous introns exhibiting the highest IME from the analysed data set.

## DISCOVERED MOTIFS

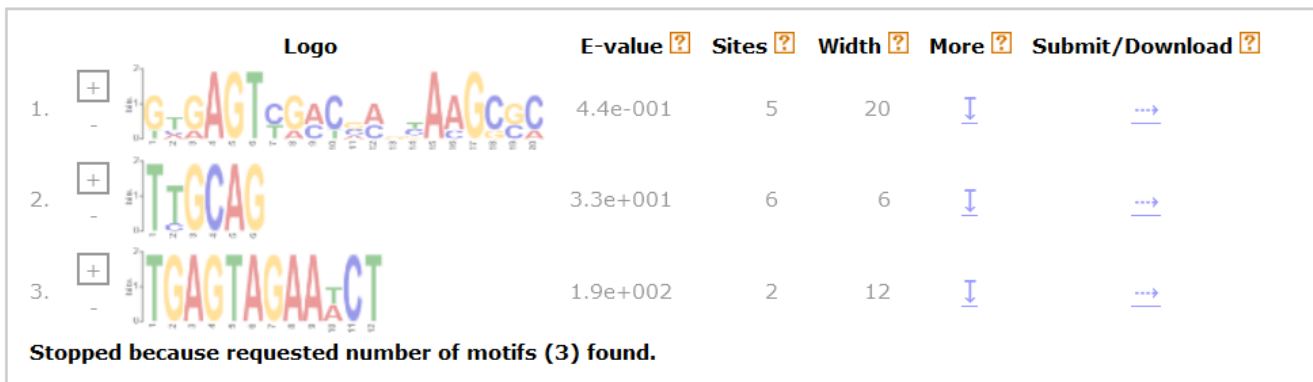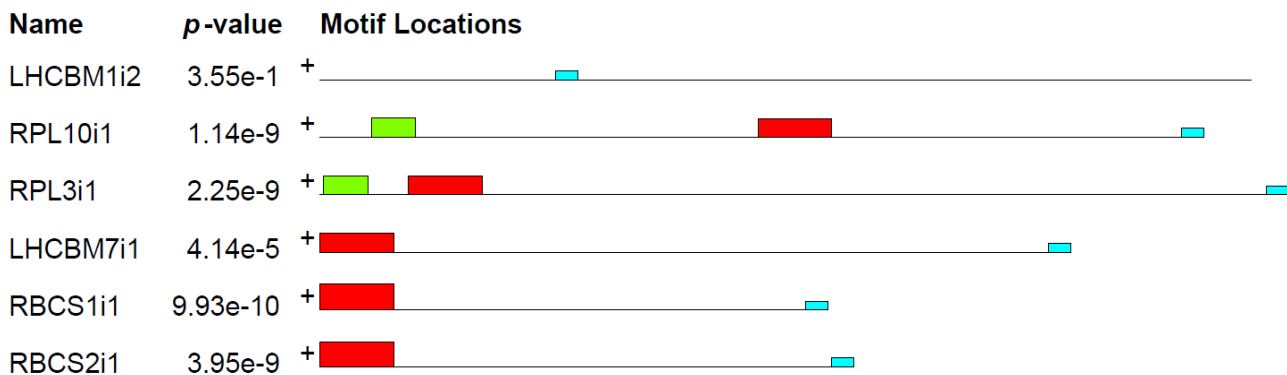

| Motif | Symbol | Motif Consensus      |
|-------|--------|----------------------|
| 1.    |        | GTGAGTYGMCVMNBAAGCSC |
| 2.    |        | TTGCAG               |
| 3.    |        | TGAGTAGAAWCT         |
