# Supplementary material for: Introns mediate post-transcriptional enhancement of nuclear gene expression in the green microalga Chlamydomonas reinhardtii
Source: PubMed Central journal article supplement (PMC7419008; doi:10.1371/journal.pgen.1008944), 2020-07-30
Supplement: pgen.1008944.s006.pdf [file pgen.1008944.s006.pdf]

S6 Fig: Motif based sequence analysis via Multiple Em for Motif Elicitation tool (MEME, version 5.1.1) performed with 16 endogenous introns exhibiting an IME of 2 or higher compared to the intronless control from the analysed data set.

**DISCOVERED MOTIFS**

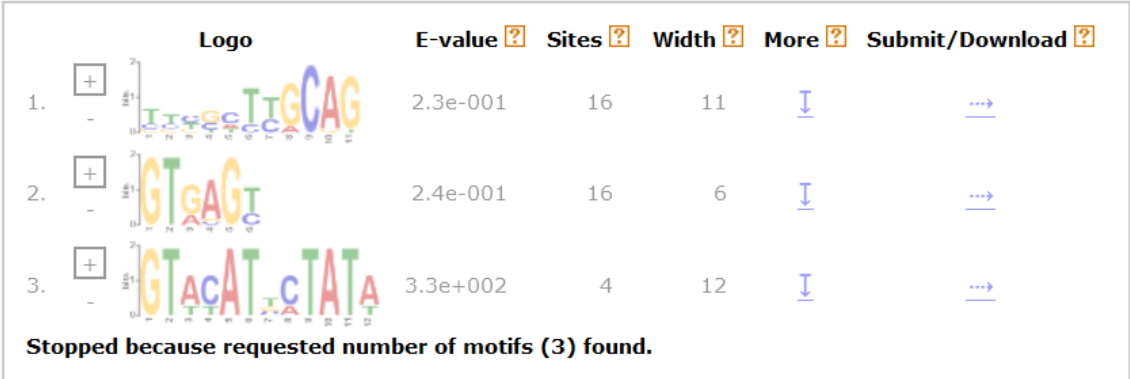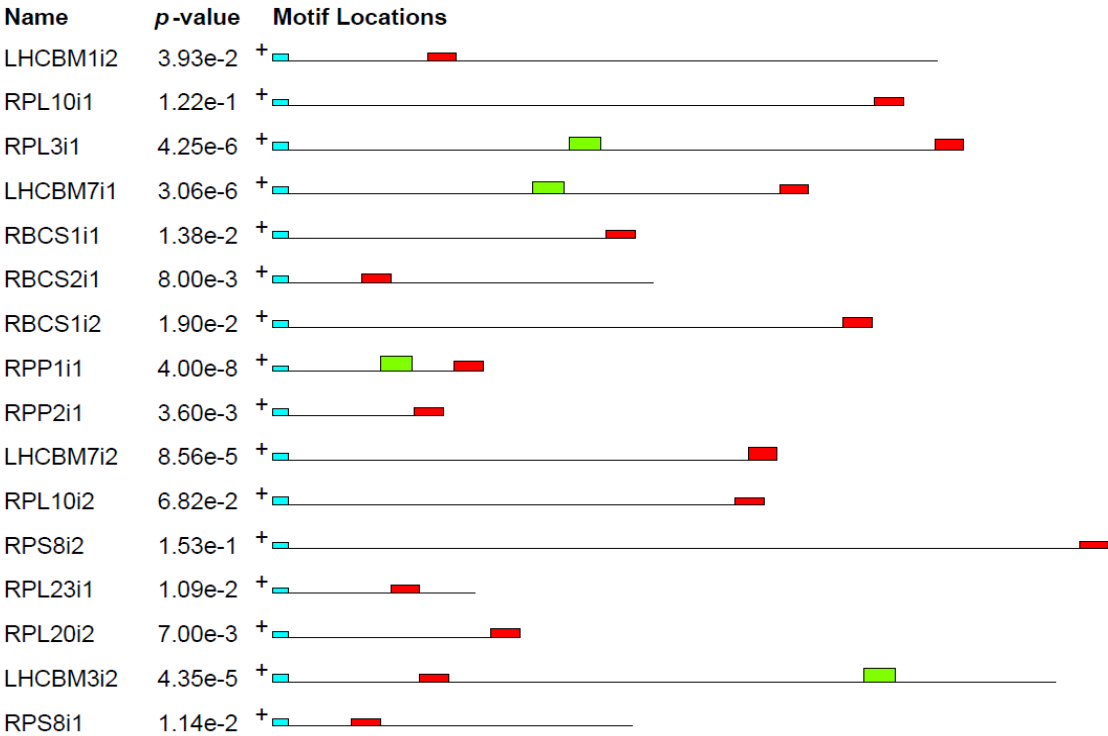

| Motif | Symbol | Motif Consensus |
|-------|--------|-----------------|
| 1.    |        | TTYSC TYGCAG    |
| 2.    |        | GTGAGT          |
| 3.    |        | GTACATBCTATA    |
